# Supplementary material for: Hierarchically porous calcined lithium/aluminum layered double hydroxides: Facile synthesis and enhanced adsorption towards fluoride in water
Source: Royal Society of Chemistry journal article supplement (doi:10.1039/c1jm13645c), 2011-01-01
Supplement: c1jm13645c.pdf [file c1jm13645c.pdf]

# Hierarchically Porous Calcined Lithium/Aluminum Layered Double Hydroxides: Facile Synthesis and Enhanced Adsorption Towards Fluoride in Water

5

Jiabin Zhou,<sup>a</sup> Ya Cheng,<sup>a</sup> Jiaguo Yu <sup>\*a</sup> and Gang Liu <sup>\*b</sup>

<sup>a</sup> State Key Laboratory of Advanced Technology for Materials Synthesis and Processing and School of Resources and Environmental Engineering,

Wuhan University of Technology, Wuhan 430070, P. R. China

10

<sup>b</sup> National Center for Nanoscience and Technology, Beijing 100190, P. R. China

**Table S1.** Unit cell parameters of the Li<sub>3</sub>Al-LDH sample

| <i>h</i> | <i>k</i> | <i>l</i> | <i>d</i> (Å) | Relative intensity (%) |
|----------|----------|----------|--------------|------------------------|
| 0        | 0        | 3        | 7.5600       | 100.0                  |
| 0        | 0        | 6        | 3.7800       | 61.2                   |
| 1        | 1        | 2        | 2.4900       | 46.3                   |
| 1        | 1        | 5        | 2.2200       | 26.9                   |
| 1        | 1        | 8        | 1.8940       | 34.1                   |
| 3        | 0        | 0        | 1.4700       | 16.3                   |
| 3        | 0        | 3        | 1.4430       | 13.3                   |

15

**Table S2.** Pseudo-first-order adsorption kinetic constants of the Li/Al-CLDH samples

| Samples                 | <i>C</i> <sub>0</sub><br>(mg/L) | <i>q</i> <sub>e,exp</sub><br>(mg/g) | Pseudo-first-order model         |                               |                       | S.D.<br>(%) |
|-------------------------|---------------------------------|-------------------------------------|----------------------------------|-------------------------------|-----------------------|-------------|
|                         |                                 |                                     | <i>q</i> <sub>e,cal</sub> (mg/g) | <i>K</i> <sub>1</sub> (1/min) | <i>R</i> <sup>2</sup> |             |
| Li <sub>2</sub> Al-CLDH | 200                             | 76.0                                | 16.8                             | 0.014                         | 0.785                 | 45.0        |
| Li <sub>3</sub> Al-CLDH |                                 | 97.2                                | 29.4                             | 0.016                         | 0.942                 | 40.3        |
| Li <sub>4</sub> Al-CLDH |                                 | 90.3                                | 39.6                             | 0.020                         | 0.966                 | 32.4        |
| Li <sub>5</sub> Al-CLDH |                                 | 62.7                                | 25.9                             | 0.016                         | 0.980                 | 33.9        |

**Table S3** Intra-particle diffusion model constants and correlation coefficients for adsorption of fluoride on Li/Al-CLDH samples

20

| Samples                 | <i>C</i> <sub>0</sub><br>(mg/L) | Intra-particle diffusion model                      |                                                     |                                                     |                       |                       |                       |                                        |                                        |                                        |
|-------------------------|---------------------------------|-----------------------------------------------------|-----------------------------------------------------|-----------------------------------------------------|-----------------------|-----------------------|-----------------------|----------------------------------------|----------------------------------------|----------------------------------------|
|                         |                                 | <i>k</i> <sub>d1</sub><br>(mg/min <sup>1/2</sup> g) | <i>k</i> <sub>d2</sub><br>(mg/min <sup>1/2</sup> g) | <i>k</i> <sub>d3</sub><br>(mg/min <sup>1/2</sup> g) | <i>C</i> <sub>1</sub> | <i>C</i> <sub>2</sub> | <i>C</i> <sub>3</sub> | ( <i>R</i> <sub>1</sub> ) <sup>2</sup> | ( <i>R</i> <sub>2</sub> ) <sup>2</sup> | ( <i>R</i> <sub>3</sub> ) <sup>2</sup> |
| Li <sub>2</sub> Al-CLDH | 200                             | 23.17                                               | 7.06                                                | 0.113                                               | 0                     | 27.91                 | 75.00                 | 1.000                                  | 0.798                                  | 1.000                                  |
| Li <sub>3</sub> Al-CLDH |                                 | 17.97                                               | 8.33                                                | 0.452                                               | 0                     | 20.16                 | 79.03                 | 1.000                                  | 0.986                                  | 1.000                                  |
| Li <sub>4</sub> Al-CLDH |                                 | 18.41                                               | 8.18                                                | 0.339                                               | 0                     | 21.69                 | 78.69                 | 1.000                                  | 0.962                                  | 1.000                                  |
| Li <sub>5</sub> Al-CLDH |                                 | 14.94                                               | 6.64                                                | 0.113                                               | 0                     | 14.38                 | 67.45                 | 1.000                                  | 0.945                                  | 1.000                                  |

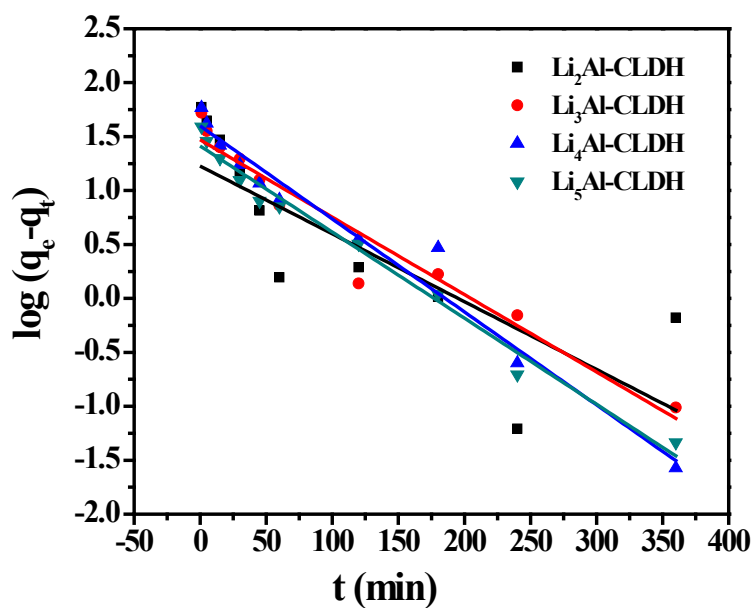

**Fig. S1.** Pseudo first-order kinetics for adsorption of fluoride on the Li/Al-CLDH samples.

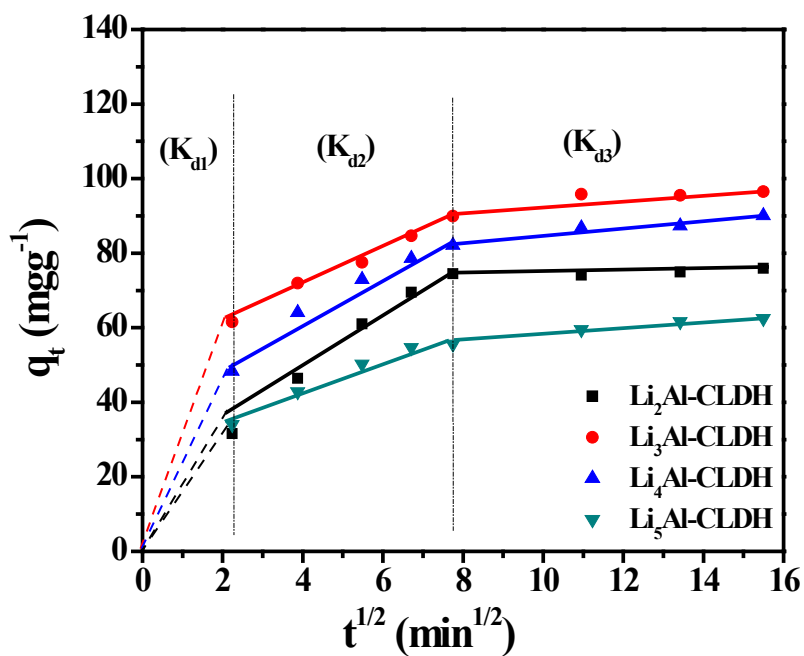

**Fig. S2.** Intra-particle diffusion kinetics for adsorption of fluoride on the Li/Al-CLDH samples.

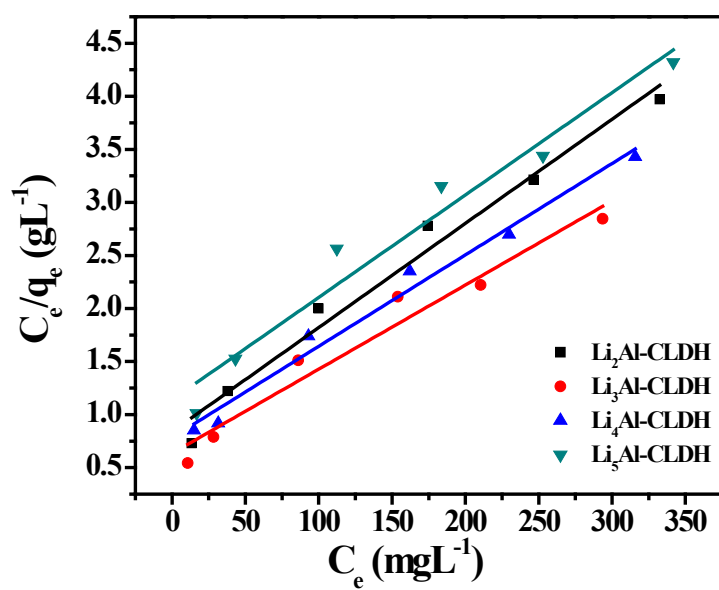

**Fig. S3.** Langmuir isotherms for fluoride adsorption on the Li/Al-CLDHs samples.
